# Supplementary material for: YD277 Suppresses Triple-Negative Breast Cancer Partially Through Activating the Endoplasmic Reticulum Stress Pathway
Source: PubMed Central journal article supplement — Theranostics. 2017 Jun 11;7(8):2339–49. doi: 10.7150/thno.17555 (PMC5505065; doi:10.7150/thno.17555), 2017-06-11
Supplement: thnov07p2339s1.pdf [file thnov07p2339s1.pdf]

## Supplementary Tables

### Supplementary Table 1

The structures of 25 compounds

| No. | Compound ID    | Molecular weight | Structures                                                                    |
|-----|----------------|------------------|-------------------------------------------------------------------------------|
| 1   | <b>YD-2-16</b> | 344.8138         | <br><chem>CC(=O)NCCNC(=O)/C=C/c1ccc(Cl)cc1</chem><br><b>YD0216</b>            |
| 2   | <b>YD-2-40</b> | 384.8776         | <br><chem>CC(=O)NCCNC(=O)N1CCCN(C1)S(=O)(=O)C</chem><br><b>YD0240</b>         |
| 3   | <b>YD-2-45</b> | 350.4326         | <br><chem>CC(=O)NCCNC(=O)N1CCCN(C1)S(=O)(=O)C</chem><br><b>YD0245</b>         |
| 4   | <b>YD-2-54</b> | 384.8776         | <br><chem>CC(=O)NCCNC(=O)N1CCCN(C1)S(=O)(=O)C</chem><br><b>YD0254 (ML264)</b> |
| 5   | <b>YD-2-60</b> | 310.3687         | <br><chem>CC(=O)NCCNC(=O)/C=C/c1ccccc1</chem><br><b>YD0260</b>                |
| 6   | <b>YD-2-62</b> | 358.8404         | <br><chem>CC(=O)NCCNC(=O)/C=C/c1ccc(Cl)cc1</chem><br><b>YD0262</b>            |
| 7   | <b>YD-2-67</b> | 400.877          | <br><chem>CC(=O)NCCNC(=O)N1CCCN(C1)S(=O)(=O)C</chem><br><b>YD0267</b>         |

|    |                |          |                                                                                                                                       |
|----|----------------|----------|---------------------------------------------------------------------------------------------------------------------------------------|
| 8  | <b>YD-2-69</b> | 399.8923 | 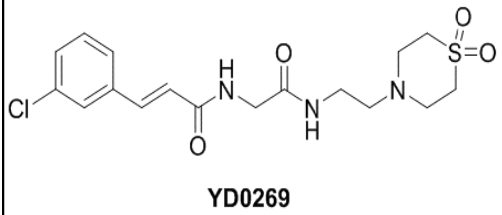 <p style="text-align: center;"><b>YD0269</b></p>   |
| 9  | <b>YD-2-70</b> | 369.3929 |  <p style="text-align: center;"><b>YD0270</b></p>   |
| 10 | <b>YD-2-71</b> | 352.8788 |  <p style="text-align: center;"><b>YD0271</b></p>   |
| 11 | <b>YD-2-72</b> | 371.8391 |  <p style="text-align: center;"><b>YD0272</b></p>  |
| 12 | <b>YD-2-77</b> | 435.9443 |  <p style="text-align: center;"><b>YD0277</b></p> |
| 13 | <b>YD-2-83</b> | 403.2914 |  <p style="text-align: center;"><b>YD0283</b></p> |
| 14 | <b>YD-2-85</b> | 434.9363 |  <p style="text-align: center;"><b>YD0285</b></p> |
| 15 | <b>YD-2-86</b> | 355.3663 |  <p style="text-align: center;"><b>YD0286</b></p> |

|    |                |          |                                                                                                                                       |
|----|----------------|----------|---------------------------------------------------------------------------------------------------------------------------------------|
| 16 | <b>YD-2-87</b> | 447.9351 | 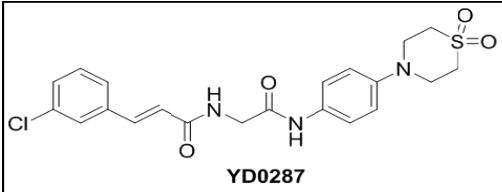 <p style="text-align: center;"><b>YD0287</b></p>   |
| 17 | <b>YD-2-90</b> | 403.2914 |  <p style="text-align: center;"><b>YD0290</b></p>   |
| 18 | <b>YD-2-95</b> | 335.8285 |  <p style="text-align: center;"><b>YD0295</b></p>   |
| 19 | <b>YD-3-2</b>  | 434.9363 |  <p style="text-align: center;"><b>YD0302</b></p>   |
| 20 | <b>YD-3-3</b>  | 413.9189 |  <p style="text-align: center;"><b>YD0303</b></p> |
| 21 | <b>YD-3-5</b>  | 445.4888 |  <p style="text-align: center;"><b>YD0305</b></p> |
| 22 | <b>YD-3-6</b>  | 403.2914 |  <p style="text-align: center;"><b>YD0306</b></p> |
| 23 | <b>YD-3-7</b>  | 418.4817 |  <p style="text-align: center;"><b>YD0307</b></p> |

|    |        |          |                                                                                                  |
|----|--------|----------|--------------------------------------------------------------------------------------------------|
| 24 | YD-3-8 | 400.4913 | 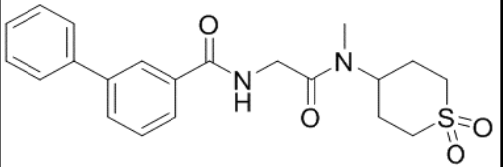 <p>YD0308</p> |
| 25 | YD-3-9 | 434.9363 |  <p>YD0309</p> |

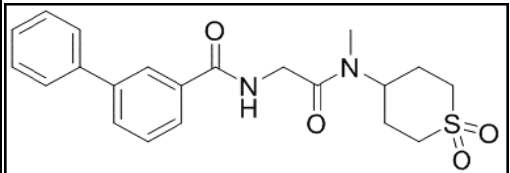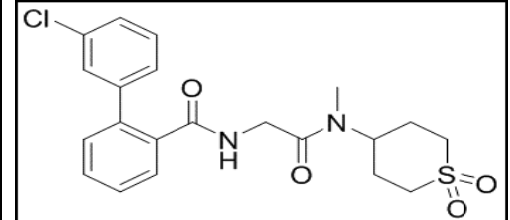

Supplementary Table 2

The antibodies used for Western Blot

| Name             | MW (KDa)    | Source | Company                  | Dilution | Product Number |
|------------------|-------------|--------|--------------------------|----------|----------------|
| PARP             | 116/89      | Rabbit | Cell signaling           | 1:1000   | 9532S          |
| Caspase3         | 32/21/14    | Rabbit | Cell signaling           | 1:1000   | 9662S          |
| cleave-Caspase 3 | 19/17       | Rabbit | Cell signaling           | 1:1000   | 9661S          |
| Caspase8         | 57/43/18    | Mouse  | Cell signaling           | 1:1000   | 9746S          |
| Caspase9         | 47/37/35/17 | Rabbit | Cell signaling           | 1:1000   | 9502S          |
| Caspase7         | 35/20       | Rabbit | Cell Signaling           | 1:1000   | 9494S          |
| CyclinD1         | 36          | Rabbit | Cell signaling           | 1:1000   | 2978S          |
| p21              | 21          | Rabbit | Cell signaling           | 1:1000   | 2947S          |
| p27              | 27          | Mouse  | BD Biosciences           | 1:1000   | 610241         |
| Bcl2             | 26          | Rabbit | Cell signaling           | 1:1000   | 2870S          |
| Bclxl            | 30          | Rabbit | Cell signaling           | 1:1000   | 2764S          |
| DR4              | 55          | Rabbit | Cell Signaling           | 1:1000   | 42533          |
| DR5              | 55/40       | Rabbit | Sigma                    | 1:1000   | D3938          |
| BID              | 22/15       | Rabbit | Cell signaling           | 1:1000   | 9942           |
| Bak              | 25          | Rabbit | Cell signaling           | 1:1000   | 9942           |
| Bax              | 20          | Rabbit | Cell Signaling           | 1:1000   | 9942           |
| AKT              | 60          | Rabbit | Cell signaling           | 1:1000   | 4685S          |
| p-AKT(Ser473)    | 60          | Rabbit | Cell Signaling           | 1:1000   | 9018P          |
| GAPDH            | 37          | Rabbit | Santa Cruz Biotechnology | 1:1000   | Sc-25778       |
| Bip              | 78          | Rabbit | Cell signaling           | 1:1000   | 3177S          |
| IRE1 $\alpha$    | 130         | Rabbit | Cell signaling           | 1:1000   | 3294S          |
| JNK              | 46,54       | Rabbit | Cell signaling           | 1:1000   | 9252S          |
| p-JNK            | 46,54       | Rabbit | Cell signaling           | 1:1000   | 9251S          |
| c-Jun            | 43,48       | Rabbit | Cell signaling           | 1:1000   | 9165S          |
| p-c-Jun          | 48          | Rabbit | Cell signaling           | 1:1000   | 9164S          |
| PREK             | 130         | Rabbit | Cell signaling           | 1:1000   | 5683S          |
| CHOP             | 19          | Mouse  | Cell signaling           | 1:1000   | 2895S          |
| ATF6             | 75          | Mouse  | abcam                    | 1:1000   | ab37149        |
| KLF5             | 55          | Rabbit | JTD                      | 1:1000   | /              |
| Anti-Rabbit IgG  | /           | Goat   | eBio-science             | 1:5000   | /              |
| Anti-Mouse IgG   | /           | Goat   | eBio-science             | 1:5000   | /              |

Supplementary Table 3

The IC<sub>50</sub> values of ML264 in cell lines

|                             | <b>Cell lines</b> | <b>IC<sub>50</sub> (μM)</b> |
|-----------------------------|-------------------|-----------------------------|
| ER $\alpha$ + Breast Cancer | MCF 7             | 11                          |
|                             | T-47D             | >12                         |
| TNBC                        | SUM 149PT         | >12                         |
|                             | MDA-MB-231        | 12                          |
|                             | MDA-MB-453        | 12                          |
|                             | MDA-MB-468        | >12                         |
|                             | Hs 578T           | >12                         |
|                             | HCC 1806          | >12                         |
|                             | HCC 1937          | >12                         |
| Normal Cells                | MCF 10A           | 7                           |
|                             | HC 11             | NA                          |
|                             | NIH3T3            | NA                          |
| Colorectal Cancer           | HCT 116           | 7                           |

## **Supplementary Materials and Methods**

### **Plasmid transfection**

One day before transfection, MDA-MB-231 cells were plated in growth medium without antibiotics in 30-70% confluence. Plasmid DNA were first diluted in the appropriate amount of Opti-MEM® I Medium without serum. Then Lipofectamine™ 2000 were diluted in the appropriate amount of Opti-MEM® I Medium without serum. Following that, DNA was mixed with Lipofectamine™ 2000 gently and incubated for 20 minutes at room temperature to allow complex formation. Finally, the DNA -Lipofectamine™ 2000 complexes were added to the cells and mixed gently by rocking the plate back and forth. The cells were incubated at 37°C in a CO<sub>2</sub> incubator for 48 hours.

## Supplementary Figure Legends

### Figure S1. YD277 induced cell death can be partially inhibited by classical caspase inhibitor Z-VAD-fmk

- A.** MDA-MB-231 cells were seeded in a 6-well plate. Eighteen hours later, the cells were pre-treated with Z-VAD-fmk (MCE, New Jersey, USA, Cat#HY-16658, 100  $\mu$ M) for 1 hour and treated with YD277 for 36 hours. Caspase-7 and PARP cleavage were examined by Western blotting.
- B.** MDA-MB-231 cells were seeded in 48 well plates. Eighteen hours later, the cells were pre-treated with Z-VAD-fmk for 1 hour and treated with YD277 for 36 hours. The SRB assay was used to measure cell viability. Data is shown as mean  $\pm$  S.D. (n=3). \*\*p < 0.01.

### Figure S2. YD277 does not change the expression levels of DR4/5, Bak, Bax, and Bid proteins

MDA-MB-231 and MDA-MB-468 cells were treated with YD277 (1, 3, 10  $\mu$ M), ML264 (10  $\mu$ M), or DMSO for 36 h, and the expression levels of apoptosis-related proteins were detected by WB.  $\beta$ -actin normalized quantitative data were shown below their panel.

### Figure S3. Over-expression of Bcl2/Bclxl partially rescued YD277-induced cell death

- A.** The pBabe-Bcl2 ( $\beta$  isoform) plasmid was used to generate retroviruses and to obtain stable Bcl2 over-expression MDA-MB-231 cell populations. Following that, the cells were transfected with pBabe-Bclxl plasmid for 36 hours and treated with YD277 (3  $\mu$ M) for another 36 hours. DMSO used as the negative control. The protein expression levels of Bclxl, Bcl2, and PARP were examined by WB.  $\beta$ -actin normalized quantitative data were shown below their panel.



**B.** The SRB assay was used to detect the cell viability. Data was shown as mean  $\pm$  S.D. (n=3) . \*p < 0.05, \*\*p < 0.01.

**Figure S4. YD277 inhibits the activation of AKT**

MDA-MB-231 cells were treated with YD277 (3  $\mu$ M) or DMSO for 36 h. MDA-MB-468 cells were treated with YD277 (3  $\mu$ M) for 48 hours. The expression levels of p-AKT and total AKT proteins were detected by WB. AKT normalized quantitative data for p-AKT was shown below the panel.

**Figure S5. YD277 induces IRE1 $\alpha$  in MDA-MB-231 cells at the transcriptional level**

- A.** YD277 increased *IRE1 $\alpha$*  mRNA levels in a dose dependent manner. SYBR Select Master Mix (Life technologies) was used for quantitative RT-PCR. MDA-MB-231 cells were treated with YD277 (1, 3, 10  $\mu$ M) for 24 hours. Total RNA was extracted for RT-qPCR. The expression levels of *IRE1 $\alpha$*  was normalized to *GAPDH*. Human *IRE1 $\alpha$*  forward primer sequence is 5'-TGTCAGAGATCTCCTCCGAG -3' and its reverse primer sequence is 5'-TCTCTCGTGGCTGCACAGCTCCA -3'. Human *GAPDH* forward primer sequence is 5'- GAAAGCCTGCCGGTGACTAA -3' and its reverse primer sequence is 5'- GCCCAATACGACCAAATCAGAGA -3'. \*, p<0.05, student's t-test.
- B.** YD277 increased *IRE1 $\alpha$*  mRNA levels in a time dependent manner. YD277 (1  $\mu$ M) was used to treat MDA-MB-231 cells for 12, 24, 36, and 48 hours. Total RNA was extracted for RT-qPCR. The expression levels of *IRE1 $\alpha$*  was normalized to *GAPDH*. \*P < 0.05, \*\*P < 0.01, Student's t-test.
- C.** YD277 increased *IRE1 $\alpha$*  mRNA levels in an actinomycin D dependent manner. YD277(1  $\mu$ M) was used to treat MDA-MB-231 cells for 12 or 24 hours. Actinomycin D( 1  $\mu$ g/ml )was added with YD277 at the same time as

indicated. Total RNA was extracted for RT-qPCR. The expression levels of *IRE1α* was normalized to *GAPDH*. \*\*P < 0.01, Student's t-test.

**A**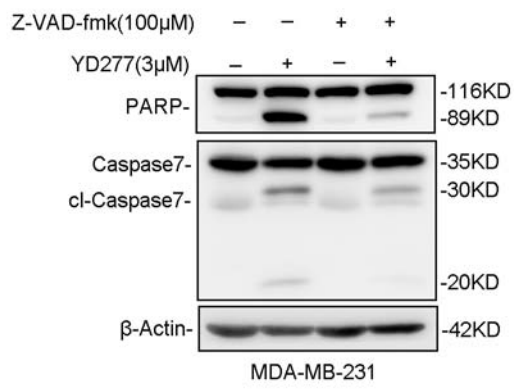**B**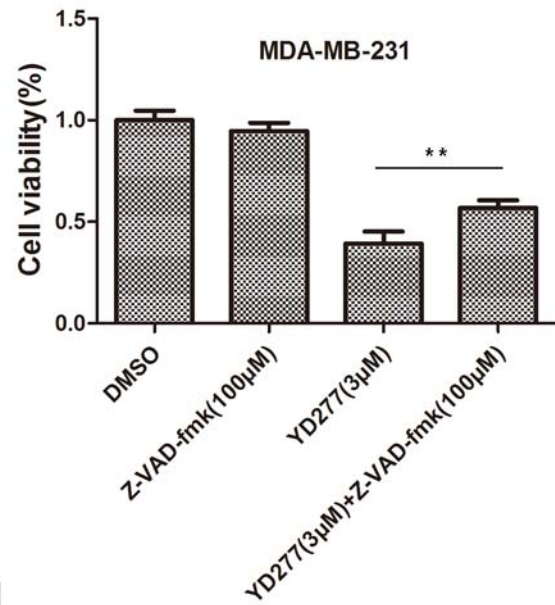**Figure S1**

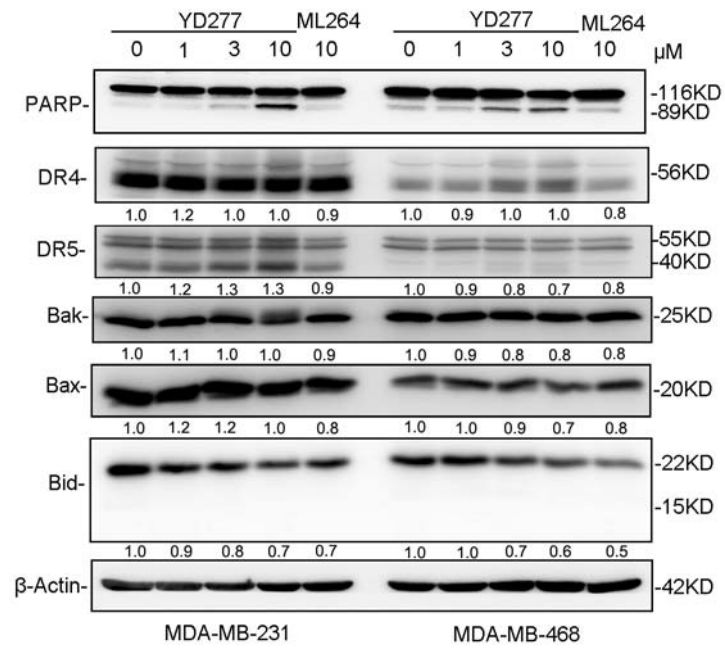

Figure S2

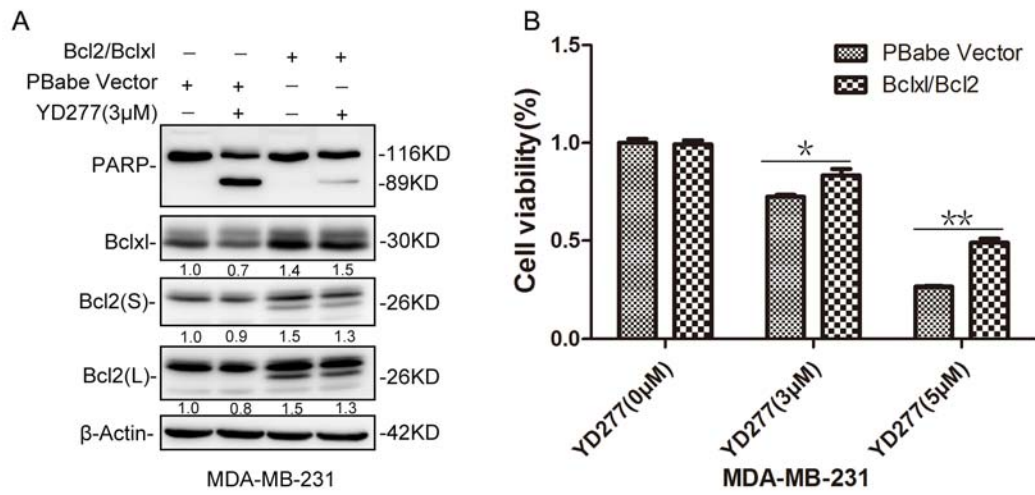

Figure S3

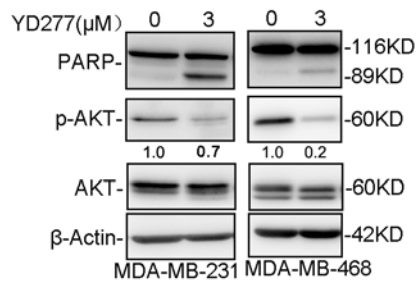

Figure S4

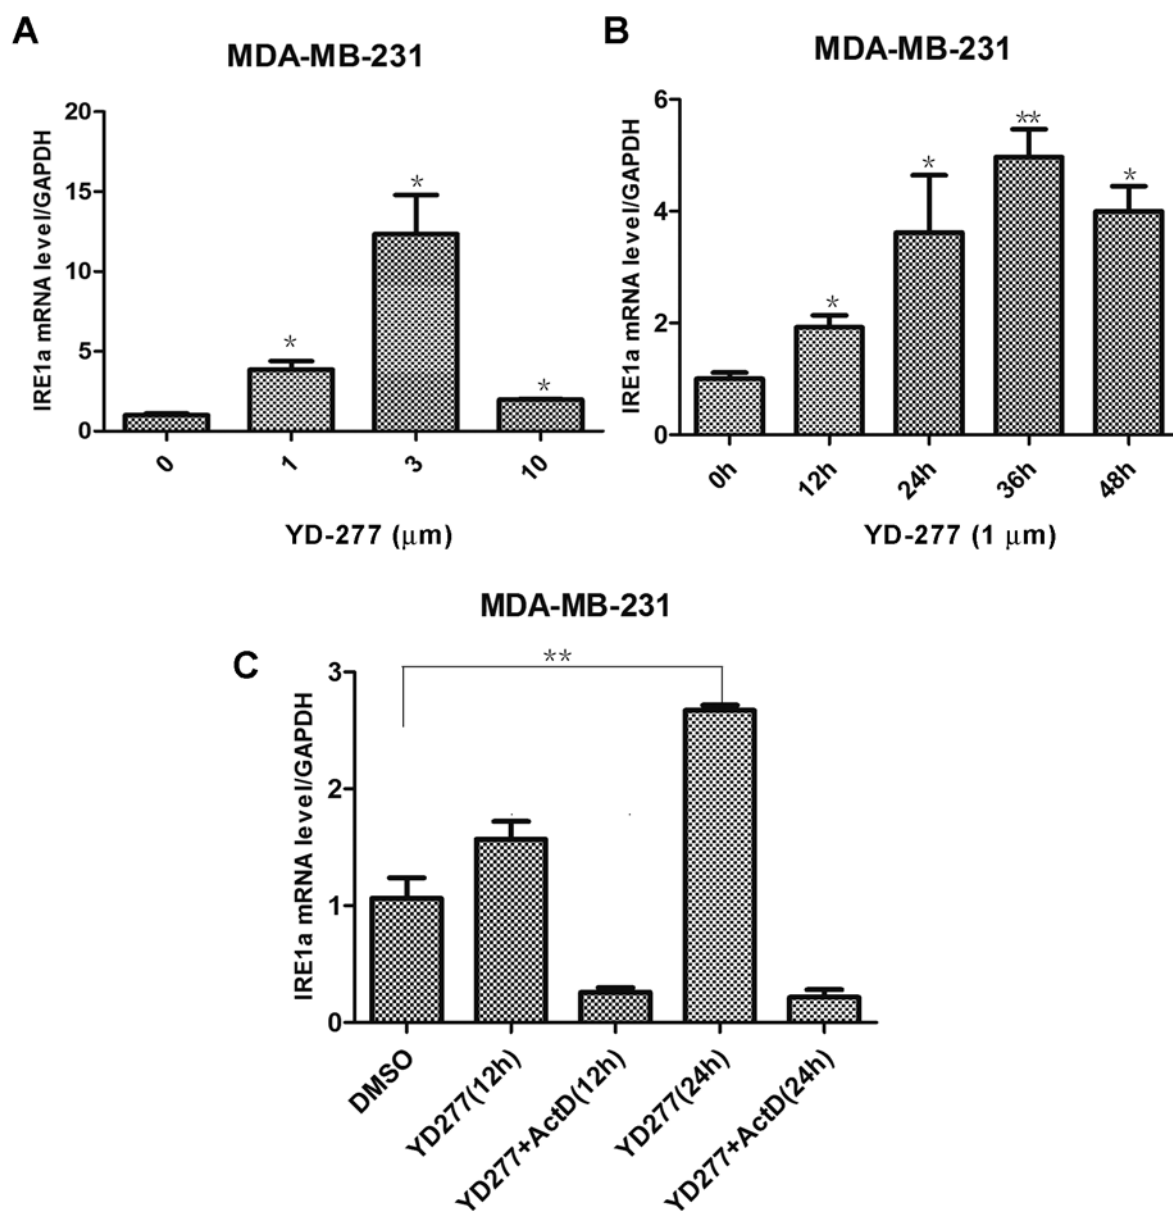

**Figure S5**
